# Supplementary material for: In Vitro Cultures of Scutellaria brevibracteata subsp. subvelutina as a Source of Bioactive Phenolic Metabolites
Source: MDPI journal article supplement (doi:10.3390/molecules28041785), 2023-02-14

**Figure S1.** The brine shrimp (*Artemia salina*) surviving larvae (%) after 24 h of incubation with *S. brevibracteata* subsp. *subvelutina* extract

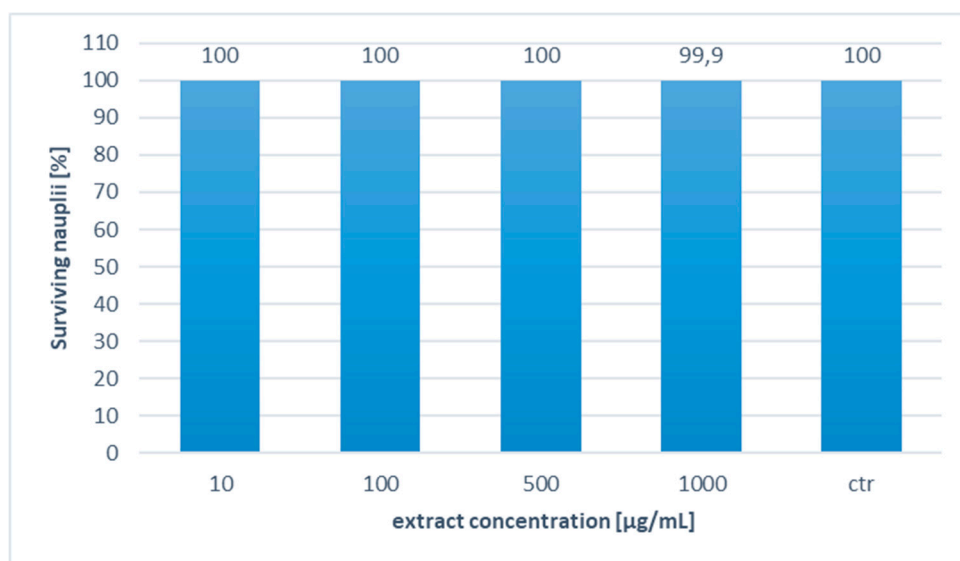

Supplement: s1 [file s1]
